# Supplementary material for: Sensing of glycoprotein via a biomimetic sensor based on molecularly imprinted polymers and graphene–Au nanoparticles
Source: Royal Society of Chemistry journal article supplement (doi:10.1039/c2an36297j), 2012-12-12
Supplement: c2an36297j.pdf [file c2an36297j.pdf]

# **Sensing of glycoprotein via a biomimetic sensor based on molecularly imprinted polymers and graphene-Au nanoparticles**

Xindong Wang <sup>a</sup>, Jing Dong <sup>a,b</sup>, Huami Ming <sup>a</sup>, Shiyun Ai <sup>a\*</sup>

a College of Chemistry and Material Science, Shandong Agricultural University, Taian, Shandong, 271018, China

b College of Resources and Environment, Shandong Agricultural University, Taian, Shandong, 271018, China

\* Corresponding authors.

Tel: +86 538 8249248

Fax: +86 538 8242251

E-mail address: ashy@sdau.edu.cn (S.Y. Ai)

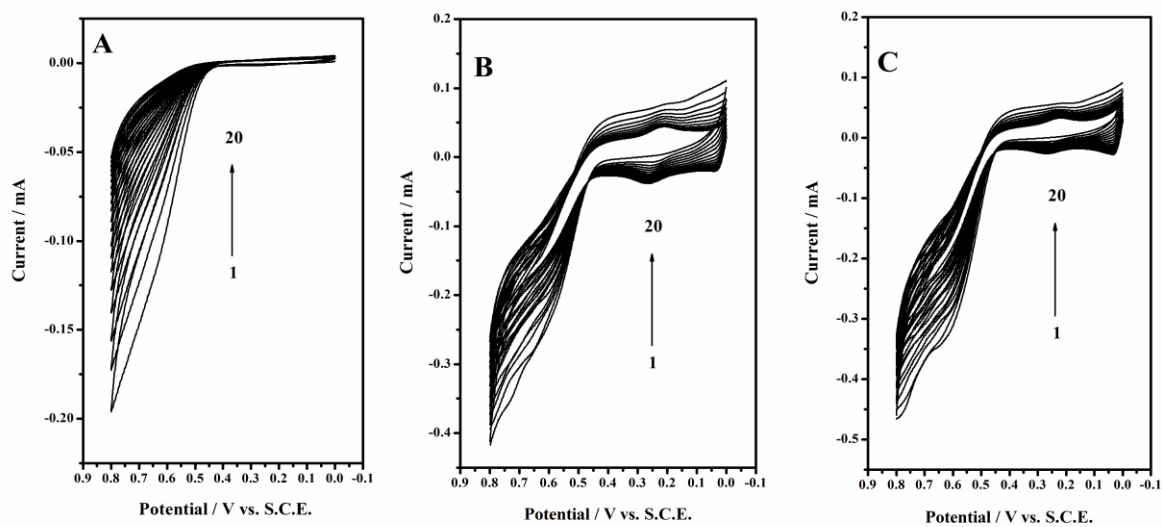

**Fig. S1** CVs of the electropolymerization on bare GCE (A), NIP/Gr-AuNPs/GCE (B), MIP/Gr-AuNPs/GCE (C) for 20 cycles in ABS (pH 5.0). The voltage range: 0.0 to 0.8 V; scan rate: 0.1 V/s; OPD: 5 mM; ABA: 10 mM.

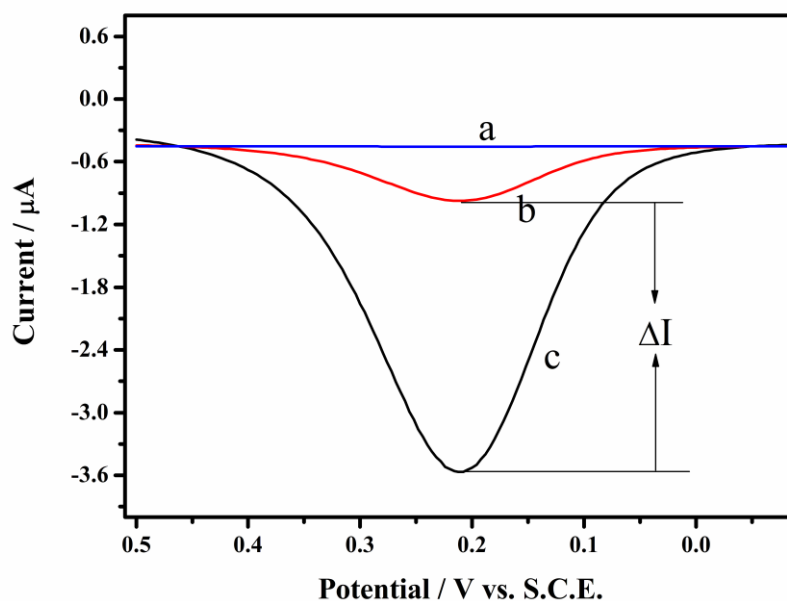

**Fig. S2** The DPV curves for NIP/Gr-AuNPs/GCE (a), NIP/Gr-AuNPs/GCE with 6-ferrocenylhexanethiol (b), and MIP/Gr-AuNPs/GCE with 6-ferrocenylhexanethiol (c).

In Fig.S2, it shows obviously that the peak current of curve a is almost completely invisible. We use  $I_1$ , and  $I_2$  to represent the peak current of curve b and curve c, respectively, and  $\Delta I$  was used to denote the difference of  $I_1$  and  $I_2$  as follows:  $\Delta I = I_2 - I_1$ . So  $\Delta I$  correlates with the concentration of BSA, and eliminates the interference of physically absorption of probe moleculars in the polymer film.

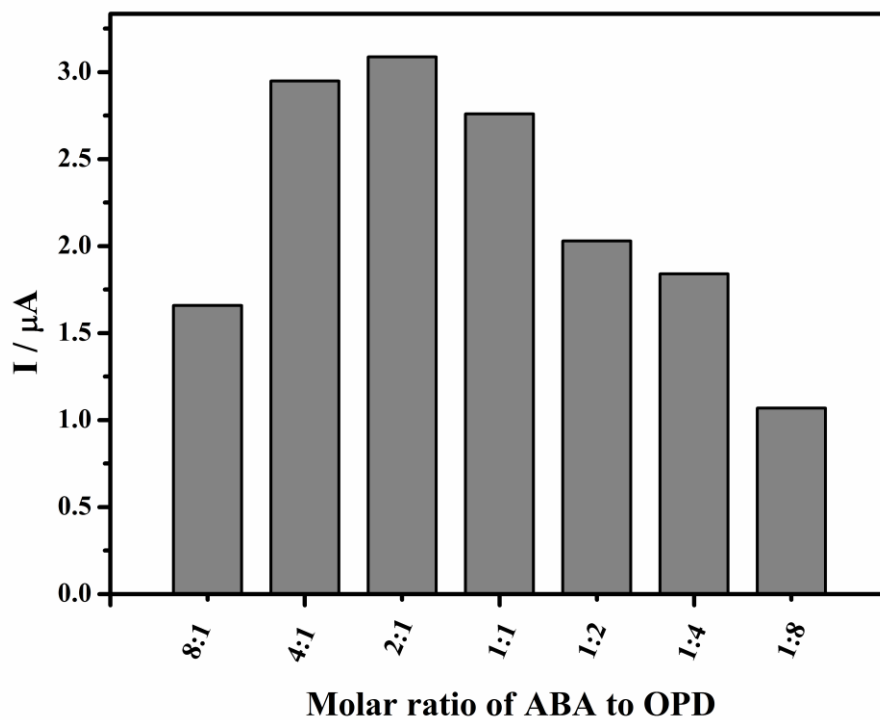

**Fig. S3** The effect of monomers molar ratio on the response current

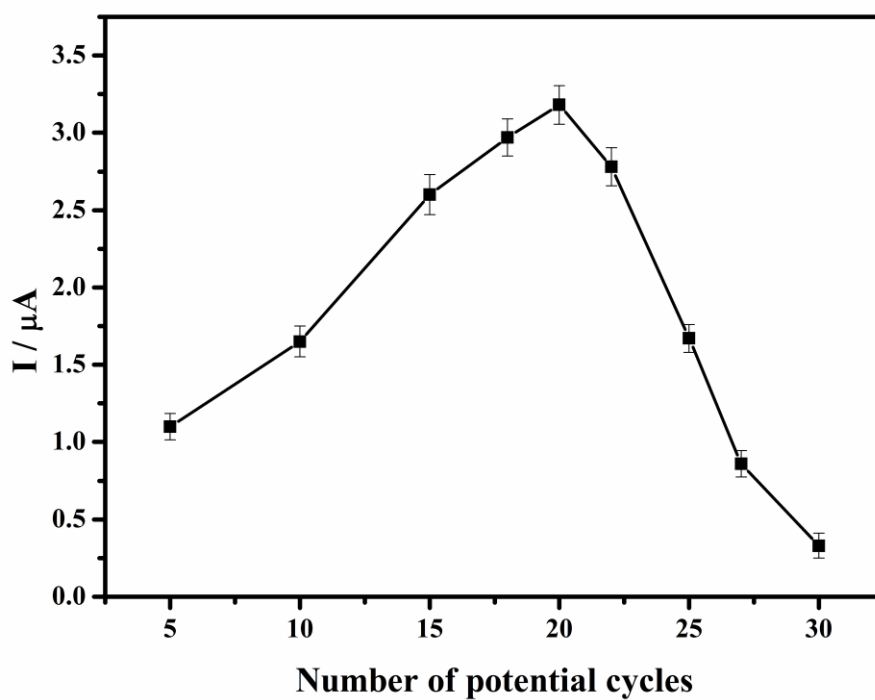

**Fig. S4** The effect of the number of potential cycles on the response current

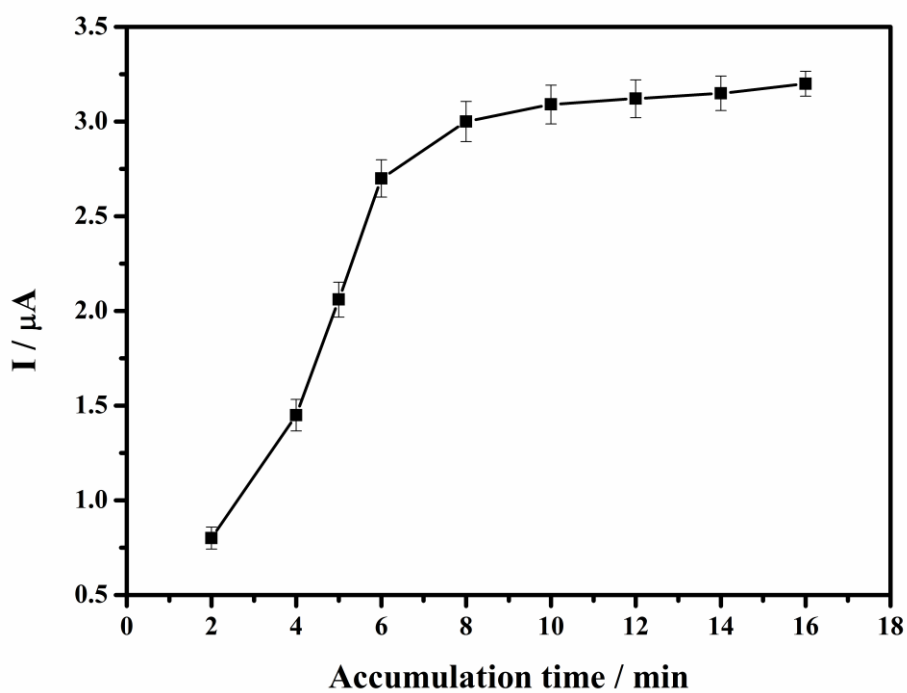

Fig. S5 The effect of accumulation time on the response current

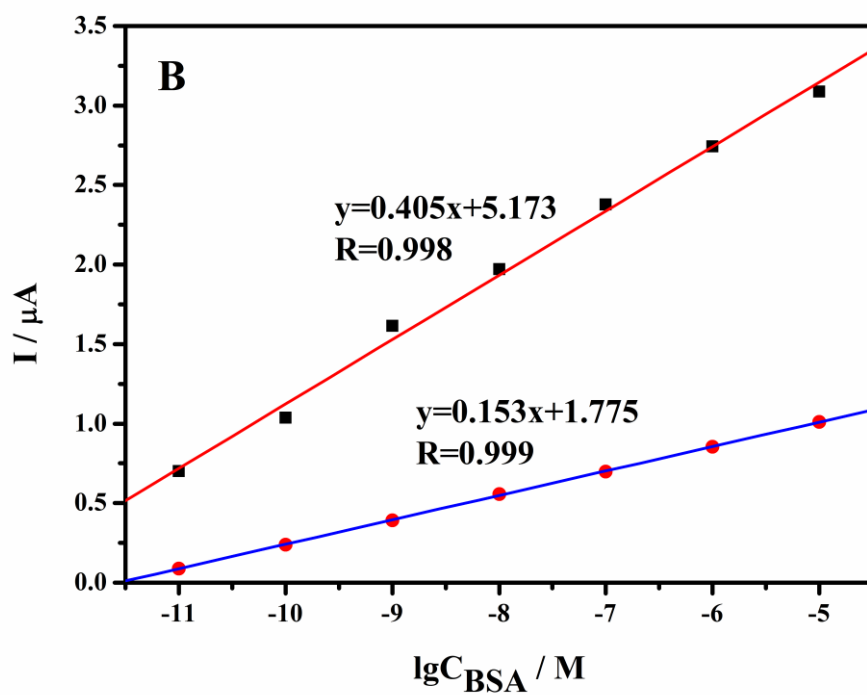

Fig. S6 calibration plots of MIP and NIP.

**Table S1** Regeneration experiments of the sensors

| BSA standard solutions (g/mL)                           | $1.0 \times 10^{-5}$ | $5.0 \times 10^{-6}$ | $1.0 \times 10^{-6}$ | $5.0 \times 10^{-7}$ |
|---------------------------------------------------------|----------------------|----------------------|----------------------|----------------------|
| ( I ) Response currents ( $\mu\text{A}$ ) <sup>a</sup>  | 3.151                | 3.022                | 2.738                | 2.620                |
| ( II ) Response currents ( $\mu\text{A}$ ) <sup>b</sup> | 2.923                | 2.802                | 2.547                | 2.436                |
| (III) Response currents shift (%) <sup>c</sup>          | 7.236                | 7.280                | 6.976                | 7.023                |

<sup>a</sup>: BSA were detected by new prepared sensors.

<sup>b</sup>: BSA were detected by regenerated sensors.

<sup>c</sup>:  $\text{III} = (\text{I} - \text{II}) / \text{I} \times 100\%$ .
